# 1 Super-resolution fight club: A broad assessment of 2D & 3D 2 single-molecule localization microscopy software

3 *Daniel Sage*<sup>\*+1</sup>, *Thanh-An Pham*<sup>+1</sup>, *Hazen Babcock*<sup>2</sup>, *Tomas Lukes*<sup>3</sup>, *Thomas Pengo*<sup>4</sup>, *Jerry Chao*<sup>5</sup>, *Ramraj*  
4 *Velmurugan*<sup>5</sup>, *Alex Herbert*<sup>6</sup>, *Anurag Agrawal*<sup>7</sup>, *Silvia Colabrese*<sup>1,8</sup>, *Ann Wheeler*<sup>9</sup>, *Anna Archetti*<sup>10</sup>, *Bernd Rieger*<sup>11</sup>,  
5 *Raimund Ober*<sup>5</sup>, *Guy M. Hagen*<sup>12</sup>, *Jean-Baptiste Sibarita*<sup>13</sup>, *Jonas Ries*<sup>14</sup>, *Ricardo Henriques*<sup>15</sup>, *Michael Unser*<sup>1</sup>,  
6 *Seamus Holden*<sup>\*+16</sup>

7 \*Corresponding authors: [daniel.sage@epfl.ch](mailto:daniel.sage@epfl.ch), [seamus.holden@ncl.ac.uk](mailto:seamus.holden@ncl.ac.uk).

8 +Equal contribution

9 1: Biomedical Imaging Group, School of Engineering, Ecole Polytechnique Fédérale de Lausanne  
10 (EPFL), Switzerland

11 2: Harvard Center for Advanced Imaging, Harvard University, Cambridge, Massachusetts, USA

12 3: Laboratory of Nanoscale Biology & Laboratoire d'Optique Biomédicale, STI - IBI, EPFL, Lausanne,  
13 Switzerland

14 4: University of Minnesota Informatics Institute, University of Minnesota Twin Cities, USA

15 5: Electrical Engineering, University of Texas Dallas, Richardson, Texas, USA

16 6: MRC Genome Damage and Stability Centre, School of Life Sciences, University of Sussex, Brighton,  
17 UK

18 7 : Double Helix LLC, Boulder, Colorado, USA

19 8 : Istituto Italiano di Tecnologia, Genova, Italy

20 9: Edinburgh Super-Resolution Imaging Consortium, University of Edinburgh, UK

21 10 : Laboratory of Experimental Biophysics, École Polytechnique Fédérale de Lausanne (EPFL),  
22 Lausanne, Switzerland

23 11: Department of Imaging Physics, Faculty of Applied Sciences, Delft University of Technology, The  
24 Netherlands

25 12: UCCS center for the Biofrontiers Institute, University of Colorado at Colorado Springs, Colorado,  
26 USA

27 13: Institut Interdisciplinaire de Neurosciences, University of Bordeaux, France

28 14: European Molecular Biology Laboratory (EMBL), Cell Biology and Biophysics Unit, Heidelberg,  
29 Germany

30 15: Quantitative Imaging and Nanobiophysics Group, MRC Laboratory for Molecular Cell Biology,  
31 University College London, UK

32 16: Centre for Bacterial Cell Biology, Institute for Cell and Molecular Biosciences, Newcastle  
33 University, UK

34  
35

## 36 **ABSTRACT**

37 With the widespread uptake of 2D and 3D single molecule localization microscopy, a large set of  
38 different data analysis packages have been developed to generate super-resolution images. To guide  
39 researchers on the optimal analytical software for their experiments, we have designed, in a large  
40 community effort, a competition to extensively characterise and rank these options. We generated  
41 realistic simulated datasets for popular imaging modalities – 2D, astigmatic 3D, biplane 3D, and double  
42 helix 3D – and evaluated 36 participant packages against these data. This provides the first broad  
43 assessment of 3D single molecule localization microscopy software, provides a holistic view of how  
44 the latest 2D and 3D single molecule localization software perform in realistic conditions, and  
45 ultimately provides insight into the current limits of the field.

## 46 INTRODUCTION

47 Image processing software is central to single molecule localization microscopy (SMLM), which  
48 delivers an order of magnitude resolution improvement on diffraction limited conventional  
49 fluorescence microscopy, from 250 nm to approximately 20 nm resolution, by temporal separation of  
50 fluorophores within a sample<sup>1-3</sup>. Efficient and automated image processing is essential to extract the  
51 super-resolved positions of individual molecules from thousands of raw microscope images,  
52 containing millions of blinking fluorescent spots.

53 Improvements in SMLM image processing algorithms have been crucial in maximizing spatial  
54 resolution and in reducing the imaging time of SMLM for compatibly with live cell imaging<sup>4-6</sup>. If SMLM  
55 is to achieve a resolving power approaching that of electron microscopy, the analysis software  
56 employed needs to be robust, accurate, and performing at current algorithmic limits. This can only be  
57 achieved through rigorous quantification of SMLM software performance.

58 The first localization microscopy software challenge was carried out in 2013, to enable robust  
59 benchmarking of 2D localization microscopy software packages<sup>7</sup>. But biology is not just a 2D problem,  
60 and a key focus of localization microscopy is the imaging of 3D imaging of nanoscale cellular  
61 processes<sup>8,9</sup>. 3D localization microscopy is a more difficult image processing problem than 2D SMLM.  
62 In addition to finding the center of diffraction limited spots to super-resolve lateral position, 3D SMLM  
63 algorithms must also extract axial information from the image, usually by measuring small changes in  
64 the shape of a point-spread function<sup>10</sup> (PSF).

65 There are roughly three common approaches for 3D SMLM. First, point spread function engineering,  
66 where the axial asymmetry of the microscope point spread function (PSF) is increased by introducing  
67 intentional aberrations in the system, ranging from simple astigmatism<sup>10</sup> to more complex PSF  
68 manipulation such as the double helix PSF method<sup>11</sup>. Second, biplane or multiplane imaging, where  
69 axial position is measured based on simultaneous measurement of PSF shape at two or more focal  
70 planes<sup>12</sup>. Third, dual objective based interferometry, where Z-position is calculated from single photon  
71 interference between opposing objectives<sup>13</sup>. Multiplane and PSF engineering methods typically obtain  
72 axial resolutions on the order of 50 nm<sup>10,11</sup>. Interferometry achieves the best axial resolution, 10-20  
73 nm<sup>13</sup>, but is not yet widely adopted.

74 Despite the widespread use of 3D localization microscopy, and challenging nature of 3D SMLM image  
75 processing, the performance of software for 3D single molecule localization microscopy has previously  
76 only been assessed for 2 or 3 software packages at a time, and without standard test data or metrics<sup>14-</sup>  
77 <sup>17</sup>. In the absence of common reference datasets and reliable assessment procedure of 3D software  
78 performance, it is not possible to objectively assess how different software affects final image quality,  
79 or which algorithmic approaches are most successful. Crucially, end-users cannot determine which 3D  
80 SMLM software package and imaging modality is optimal for their application.

81 We therefore ran the first 3D localization microscopy software challenge, to assess the performance  
82 of 3D SMLM software. We assessed software performance on synthetic datasets for three popular 3D  
83 SMLM modalities: astigmatic imaging, biplane imaging and double helix point spread function  
84 microscopy. We also assessed astigmatism software performance on two real STORM datasets. We  
85 ran a second 2D localization microscopy software challenge, to reassess the 2D SMLM software state-  
86 of-the-art on new, tougher, more realistic datasets.

87 Our simulations incorporate experimentally acquired point spread functions for maximal authenticity,  
88 used signal and noise levels based closely on common experimental conditions, and incorporated a  
89 realistic 4-state model of fluorophore photophysics<sup>18</sup>. Our synthetic data was designed to mimic two  
90 common classes of cellular structure: narrow line-like microtubules (MT) and larger tubes similar to  
91 the endoplasmic reticulum (ER) or mitochondria. Our simulations also included conditions with low  
92 density (LD) of active fluorophores, used experimentally to obtain maximal resolution, and with high  
93 density (HD) of active fluorophores, used experimentally for fast or live cell imaging.

## 94 RESULTS

### 95 Competition design

96 We established a large committee from within the SMLM research community, including  
97 experimentalists and software developers, to define the scope of the challenge, ensure realism of the  
98 datasets and define analysis metrics. We further opened this discussion to the whole community,  
99 through an open forum, discussing best practices for the implementation of this contest<sup>19</sup>.

100 Thirty-six software packages have been entered in the competition thus far, including four packages  
101 used in commercial software (Table S1, Supplementary Note 5). Excitingly, participation in the  
102 competition actually led at least 8 teams to their software to support additional 3D SMLM modalities,  
103 showing how competition fosters microscopy software development.

104 In 2016, we ran a first round of the 3D SMLM competition with explicit submission deadlines, with 30  
105 competitor teams, culmination in a special session at the 6th annual Single Molecule Localization  
106 Microscopy Symposium (SMLMS 2016). Since then, the challenge has been opened to continuously  
107 accept new entries. We have had 12 new registrations of which 5 have submitted localizations,  
108 including a multiple best-in-class performer (SMAP-2018<sup>20</sup>, an updated version of previously entered  
109 software) demonstrating the utility of the competition as an evolving measure of the state of the field.

### 110 Realistic 3D simulations

111 Testing super-resolution software on experimental data lacks the ground truth information required  
112 for rigorous quantification of software performance. Therefore, realistic simulated 3D SMLM datasets  
113 are required. After comparison of simulated microscope PSFs with multiple experimental PSFs from  
114 SMLM microscopes around the world, we observed that a critical challenge to realistic 3D SMLM  
115 simulations was to accurately model the experimental microscope PSF for each 3D modality. Even  
116 experimental 2D PSFs showed significant aberrations away from the focal plane (Fig S10).

117 3D SMLM inherently involves addition of aberrations to the microscope PSF to encode the Z-position  
118 of the molecule. For the PSF models included in the competition: 2D, astigmatic (AS), double helix  
119 (DH), and biplane (BP), we observed that the PSFs showed complex aberrations not well described by  
120 simple analytical models (Fig S10). We thus combined experimental 3D PSFs with simulated ground  
121 truth by performing simulations using PSFs directly derived from experimental calibration data (Fig 1,  
122 *Methods*). The experimental PSFs used to generate the simulated data are available online (*Methods*).  
123 As the goal of this study was to compare software obtained on typical SMLM microscopes, we  
124 deliberately chose PSFs representative of common implementations of each 3D modality. However,  
125 additional PSF engineering should improve results of any specific modality, for example adaptive-  
126 optics corrected astigmatism<sup>21</sup>, or reduced Z-range, higher SNR DH-PSF designs<sup>22</sup>.

127 For the 3D competition, we simulated synthetic 25 nm diameter microtubules (Fig 1). For the 2D  
128 competition, in addition to synthetic microtubules (MT), we simulated larger diameter 150 nm  
129 cylinders, designed to approximate larger cellular structures such as mitochondria and the  
130 endoplasmic reticulum (ER) (Fig 1). We incorporated a 4-state model of fluorophore photophysics,  
131 including a transient dark state (dye “blinking”) and a bleaching pathway (Fig S1C).

132 As performance at different density of active emitters is a key challenge for SMLM software, we  
133 generated 3D competition datasets at both sparse emitter density (0.2 mol. [molecule]  $\mu\text{m}^{-2}$ ) and high  
134 emitter density (2 mol.  $\mu\text{m}^{-2}$ ). We additionally generated a very high density dataset (5 mol.  $\mu\text{m}^{-2}$ ) for  
135 the 2D competition.

136 We generated data at three different signal-to-noise ratio (SNR) levels, based on real signal to noise  
137 levels encountered under common SMLM experimental scenarios: fixed cells antibody labelled with  
138 organic dye<sup>10</sup>, fluorescent protein labelling<sup>1</sup>, and live cell affinity dye labelling<sup>23,24</sup>.

139 Together, these simulations closely resemble experimental 3D and 2D data under a range of  
140 challenging conditions of SNR, spot density, axial thickness and structure summarized in Table S2. In  
141 addition, we provide simulated z-stacks of bright beads for software calibration. The competition  
142 datasets are available online (*Methods*).

### 143 **Quantitative performance assessment of 3D software**

144 We assessed software performance by 26 quality metrics (*Supplementary Note 1*). The complete set  
145 of summary statistics, axially resolved performance and super-resolved images is available for each  
146 competition software on the competition website. We built an interactive ranking and graphing  
147 interface that allows easy ranking and graphing of software performance by any metric, including new  
148 user defined metrics (Fig S11). Detailed individual software reports can also be accessed, along with  
149 a tool for side-by-side comparison of software (Fig S11, S22).

150 We focused our analysis primarily on metrics directly derived from single molecule localizations.  
151 Choice of ranking metric is discussed in detail in Supplementary Note 1.6, where several alternative  
152 ranking metrics are also presented.

153 *1. Single molecule localization error.* The foremost consideration for localization software is how  
154 accurately it finds the position of labelled molecules. This was quantified as the root mean squared  
155 localization error (RMSE) between the measured molecule position and the ground truth, in both the  
156 lateral (XY) and axial (Z) dimensions.

157 *2. Ability to successfully detect fluorescent molecules.* In addition to localization precision, SMLM  
158 image resolution depends critically on number of localized molecules<sup>25</sup>, so it is crucial for SMLM  
159 software to accurately detect a large fraction of molecules in a dataset, and minimize false  
160 localizations. For every frame, we identified the localizations that are close enough to a ground-truth  
161 position as true-positives (TP), the spurious localizations as false-positives (FP) and the undetected  
162 molecules as false-negatives (FN). We then computed the *Jaccard index* (JAC, %), which measures the  
163 fraction of correctly detected molecules in a dataset:

$$164 \quad JAC = 100 \frac{TP}{TP + FP + FN}$$

165 For ranking purposes, we developed a single summary statistic for overall evaluation of software  
166 performance, which we term the *efficiency* ( $E$ ), encapsulating both the software's ability to find  
167 molecules, measured by the Jaccard index, and the software's ability to precisely localize molecules.

$$168 \quad E = 100 - \sqrt{(100 - JAC)^2 + \alpha^2 \cdot RMSE^2}$$

169 The trade-off between these two metrics is controlled by a parameter  $\alpha$ . In a retrospective analysis,  
170 we chose  $\alpha = 1 \text{ nm}^{-1}$  for the lateral efficiency  $E_{\text{lat}}$ ,  $\alpha = 0.5 \text{ nm}^{-1}$  for the axial efficiency  $E_{\text{ax}}$ , based on the  
171 linear regression slope between the localization errors and Jaccard index (Fig 17J-K). Using this  
172 definition, an average software performance has an efficiency in the range 25-75, a perfect software  
173 would have the maximum efficiency of 100. Overall 3D efficiency was calculated as the average of  
174 lateral and axial efficiencies. Overall software rankings (Fig 2) were calculated as the sum of rankings  
175 for high and low SNR datasets.

### 176 **Performance of 3D software**

177 Complete rankings for each imaging modality and spot density are presented (Fig 2), together with  
178 summary information on all competition software (Table S1, *Supplementary Note 1*). As these data  
179 are continuously updated on the competition website, this resource provides microscopists with a  
180 quick reference for the current state of the art, including current best-in-class performers for each  
181 category.

182 After assembling an overall summary of best performers for each competition category, we  
183 investigated the performance of software within each imaging modality.

#### 184 *Astigmatic localization microscopy*

185 Astigmatic localization microscopy is probably the most popular imaging 3D SMLM modality, reflected  
186 by the highest number of software submissions in the 3D competition (Fig 2). For astigmatism, we  
187 observed a large spread of software performance, even for the most straightforward high SNR, low  
188 spot density (LD) conditions (Fig 3, Table S5). The best-in-class software (SMAP-2018) has significantly  
189 better localization error and Jaccard index performance than average (lateral RMSE 26 nm best vs 38  
190 nm average, axial RMSE 29 nm best vs 66 nm average, Jaccard index 85 % best vs 74 % average).  
191 Clearly, the quality of the image reconstruction depends strongly on choice of 3D software.

192 To investigate the reasons for software variation, we inspected plots of software performance as a  
193 function of axial position in the low density, high SNR dataset for best-in-class and representative  
194 middle-range software (Fig S7A). We observed that the key cause of the spread in software  
195 performance is variation in software performance away from the focal plane. Near the focal plane,  
196 most software packages perform well. However, the axial and lateral RMSE away from the plane of  
197 focus is significantly higher for the best in class software, and the Jaccard index is also slightly improved  
198 (Fig S7A). This is also visibly apparent in the super-resolved images (Fig 4A). We observed that best-in-  
199 class software had a Z-range (the FWHM range of axially resolved software recall, *Methods*) of 1170  
200 nm, greater than two-thirds of the simulated range. Outside this range, the recall and Jaccard index  
201 dropped sharply, probably due the large increase in PSF size and decrease in effective SNR at  
202 significant defocus (Fig S10).

203 When we examined results for the low SNR, low density dataset (Fig 2B, 3B), we found an expected  
204 two-fold degradation in best-in-class RMSE (lateral RMSE 39 nm, axial RMSE 60 nm), due to the  
205 decrease in image SNR. However, the best-in-class software (SMolPhot<sup>26</sup>) Jaccard index was effectively  
206 constant between the low and high SNR datasets (86 % vs 85 %), although the Z-range did drop at  
207 lower SNR (930 nm vs 1120 nm). The best astigmatism software packages were thus remarkably good  
208 at finding spots at low SNR, even away from the plane of focus.

209 We analyzed how close software performance was to theoretical limits by calculating the Cramér-Rao  
210 lower bound (CRLB) as a function of axial position for each dataset and comparing it to the best-in-  
211 class software results (Fig S8, S9, Supplementary Note 4). Close to the focus, best-in-class software  
212 was close to CRLB performance (within 25 %), but significant deviations for the CRLB limit occurred >  
213 200 nm. This could be due to the difficulty in actually detecting the spots away from focus.

214 When we examined astigmatic software performance for the challenging high spot density datasets  
215 (Fig 2B, 3), performance was reduced. For the high SNR high spot density dataset (best software,  
216 SMolPhot), localization error increased and Jaccard index decreased significantly compared to the low  
217 density condition (lateral RMSE best HD 51 nm vs best LD 27 nm, axial RMSE best HD 66 nm vs best  
218 LD 29 nm, Jaccard index best HD 66 % vs best LD 85 %). Inspection of the super-resolved images  
219 (Fig S3) nevertheless shows acceptable results for the HD dataset, particularly in the lateral dimension.  
220 In many circumstances, the performance reduction at 10x higher spot density should be acceptable  
221 for 10x faster, potentially live-cell-compatible, imaging speed. We also observed a large spread of  
222 software performance for the high density datasets, probably because a significant fraction of the  
223 software packages were primarily designed for low density conditions.

224 We observed poor performance for the most challenging low SNR high spot density astigmatism  
225 dataset (Fig 2, 3, S4, best software SMolPhot). Best-in-class localization precision and Jaccard index  
226 decreased significantly (lateral RMSE 76 nm, axial RMSE 101 nm, Jaccard index 58 %). These data  
227 suggest that low SNR high density 3D astigmatic localization microscopy entails a significant reduction  
228 in image resolution.

## 229 *Double helix point spread function localization microscopy*

230 We next analyzed the performance of the double helix software (Fig 3B, S14A). For the software in the  
231 high SNR low spot density condition, double helix software showed more uniform performance than  
232 astigmatism. Best-in-class software (SMAP-2018) showed only a limited improvement compared with  
233 average software (Fig 3B, lateral RMSE, 27 nm best vs 37 nm average; axial RMSE 21 nm best vs 34 nm  
234 average; Jaccard index 77 % best vs 73 % average). In general software localization performance was  
235 close to the CRLB (Fig S8, S9). We observed that performance of the software away from the focal  
236 plane is relatively uniform (Fig 4A, S7A), and best-in-class Z-range at high SNR was large at 1180 nm  
237 (Fig S7, Table S5). Double helix imaging may show less software-to-software variation and large Z-  
238 range at low spot density than astigmatic imaging because the PSF shape and intensity are fairly  
239 constant as a function of Z – compared to astigmatic imaging, where spot size, shape and intensity  
240 vary greatly as a function of Z (Fig S10).

241 Double helix software performance decreased significantly for the low spot density low SNR condition  
242 (best software SMAP-2018), particularly in terms of best-in-class Jaccard index (66 % low SNR vs 77 %  
243 high SNR, Fig 3B, S4, S14A). DH Jaccard index was also significantly worse than astigmatism results at  
244 either high or low SNR (85 % high SNR, 86 % low SNR). This indicates that it was quite hard to  
245 successfully find localizations in the low SNR DH dataset, likely because the large size of the DH PSF  
246 spreads emitted photons over a large area, lowering effective image SNR. DH PSF designs with reduced  
247 Z-range but more compact PSF would likely be less sensitive to this issue<sup>22</sup>.

248 Double helix software performed poorly on the high spot density datasets at high SNR (best software  
249 CSpline<sup>27</sup>), especially in terms of the Jaccard index (Fig 3B, S14A, best lateral RMSE 67 nm, best axial  
250 RMSE 69 nm, best Jaccard index 46 %). The poor performance at high spot density is again probably  
251 because the large DH PSF size increases spot density and decreases SNR (Fig S10). DHPSF performance  
252 at high spot density and low SNR was also not reliable (Fig. 3B, S14A, best software SMAP-2018).

## 253 *Biplane localization microscopy*

254 Best-in-class biplane software (SMAP-2018), at low spot density and for both high and low SNR,  
255 delivered the best performance in any modality (high SNR: lateral RMSE 12.3 nm, axial RMSE 21.7 nm,  
256 Jaccard 87 %), despite a slightly decreased image SNR for the biplane simulations (*Methods*). We  
257 observed a significant spread in software performance in terms of lateral RMSE and Jaccard index,  
258 with the best-in-class software significantly outperforming the other competitors (Fig S14B, 2D). At  
259 low spot density, best-in-class biplane software (SMAP-2018) showed good performance as a function  
260 of Z, with high Jaccard index over almost the entire Z-range of the simulations, and with a Z-range of  
261 1200 nm at high SNR (Fig S7, Table S5). The axial RMSE was relatively uniform as a function of Z and  
262 close to the CRLB limit (Fig S7). As axial and lateral RMSE are both averaged over the entire Z-range,  
263 the strong biplane results arise from good performance across a large Z-range (Fig S7).

264 At high spot density and high SNR, best-in-class biplane software (SMAP-2018) showed acceptable  
265 super-resolved performance (Fig 3B, S3, S14B, best lateral RMSE 43 nm, best axial RMSE 49 nm, best  
266 Jaccard index 61 %). Uniquely among the 3D modalities, best-in-class biplane software also gave  
267 acceptable performance at high spot density and low SNR (Fig 3B, S3, S14B, best lateral RMSE 55 nm,  
268 best axial RMSE 72 nm, best Jaccard index 61 %, best software SMAP-2018).

## 269 **Performance of 2D software**

270 Alongside the 3D challenge, we ran a second edition of the 2D localization microscopy software  
271 challenge<sup>7</sup> to assess how the latest 2D software performed on more challenging, more realistic  
272 datasets, and to provide an assessment of how the field had progressed since the last challenge. We  
273 used the new simulation software, including an experimentally derived PSF and a realistic blinking  
274 model, and also simulated a very high spot density condition (5 molecules/ $\mu\text{m}^2$ ). We created a more  
275 spatially extended test structure, "pseudo-endoplasmic reticulum" (pseudo-ER), composed of 150 nm

276 diameter hollow tubes, to avoid artefacts due to 1D simulated structures<sup>28</sup>. We generated two  
277 different imaging conditions with overall similar SNR but different brightness properties; one with low  
278 fluorophore brightness and low autofluorescence (the low SNR condition for the 3D challenge,  
279 designed to simulate fluorescent protein based SMLM, Fig S5) and one with high fluorophore  
280 brightness and high autofluorescence (to simulate affinity-dye-based live cell SMLM, Fig S6). We used  
281 lateral RMSE, Jaccard index and overall lateral efficiency to rank the 2D software (Fig 2, S2, Table S1).

282 For the pseudo-ER dataset, at low density, best-in-class software (ADCG) performed well (Fig. S2, S5),  
283 with a Jaccard index of 90 % and lateral RMSE of 31 nm, substantially better than the class average  
284 (Jaccard index 72 %, lateral RMSE 36 nm). Low density results for the dimmer fluorophore  
285 microtubules dataset were similar to the brighter pseudo-ER dataset (Fig S2, best software SMolPhot).  
286 For the very high density 2D dataset, which had 25x higher spot density than the LD dataset, best-in-  
287 class software (ADCG) showed excellent performance, with Jaccard index of 75% and lateral RMSE of  
288 45.5 nm (Fig S2). Best-in-class performance (ADCG) on the dimmer fluorophore data at high spot  
289 density was also strong (Fig S2, best Jaccard index 70 %, best lateral RMSE 51 nm).

## 290 Algorithms

291 We identified several classes of algorithm participant software (Table S1):

292 1) *Non-iterative* software tends to regroup the pixels in the local neighborhood of the candidates, like  
293 interpolation, center of mass (QuickPALM<sup>29</sup>) or template matching (WTM<sup>30</sup>). These (often older)  
294 algorithms are fast but tend to achieve poor performance (Table S1).

295 2) *Single emitter fitting* software is usually built on a multi-step strategy of detection, spot localization,  
296 and optional spot rejection. The detection step finds bright spots in noisy images on the pixel grid. The  
297 selection of candidates is usually performed by local maximum search after a denoising filter. Others  
298 rely on more complex algorithms like the wavelet transform (*e.g.*, WaveTracer<sup>31</sup>). We did not observe  
299 software ranking to depend significantly on the choice of optimization scheme, least-square, weighted  
300 least-square or maximum-likelihood estimator (Table S1).

301 3) *Multi-emitter fitting* software groups clusters of overlapping spots, and simultaneously fits multiple  
302 model PSFs to the data. Typically, fitted spots are added to the cluster until a stopping condition is  
303 met<sup>4,5</sup>. This leads to improved localization performance at high spot density, at the cost of reduced  
304 speed. This class of software (*e.g.*, 3D-DAOSTORM<sup>14</sup>, CSpline, PeakFit<sup>32</sup>, ThunderSTORM<sup>33</sup>) was  
305 amongst the top performers in each 2D and 3D competition category (Table S1).

306 As expected, single- and multiple-emitter fitting methods both performed well on low density data  
307 (Table S1); apparently at the densities studied, exclusion of occasionally overlapping spots by single-  
308 emitter software is sufficient for strong performance; explicit multi-emitter fitting is not required. For  
309 the 2D challenge, multi-emitter fitting showed a clear advantage over single emitter fitting at high  
310 density (Table S1). Surprisingly however, well-tuned single-emitter fitting algorithms (SMolPhot,  
311 SMAP-2018) outperformed multi-emitter algorithms for the 3D high density conditions.

312 4) *Compressed sensing algorithms*. One subset of these algorithms utilize deconvolution with sparsity  
313 constraints to reconstruct super-resolved images<sup>34–36</sup>. Although deconvolution approaches can give  
314 good results, they are limited by the necessary use of a sub-pixel grid; increased localization precision  
315 requires smaller grid resolution, which must be balanced against increased computational time.  
316 Recent approaches address this issue by localizing the point sources in a grid-less manner using an  
317 alternating descent conditional gradient scheme under some sparsity constraint (ADCG<sup>37</sup>, SMfit,  
318 SOLAR\_STORM, TVSTORM<sup>38</sup>). This software class consistently gave the overall best performance for  
319 2D high-density (ADCG<sup>37</sup> 1<sup>st</sup>, FALCON<sup>36</sup> 2<sup>nd</sup>, SMfit 3<sup>rd</sup>).

320 5) *Other approaches*. Of the alternative algorithmic approaches used (Table S1), the annihilating filter-  
321 based method LEAP<sup>39</sup> gave good performance for biplane imaging (the only modality for which it was

322 entered). Recently, we received the first challenge submission from a deep learning SMLM software  
323 (DECODE); these promising preliminary results are available on the competition website.

#### 324 *Post-hoc temporal grouping*

325 Because molecule on-time is stochastically distributed across multiple frames, a common post-  
326 processing approach to improve localization precision is to group molecules detected multiple times  
327 in adjacent frames, and average their position<sup>40</sup> (Supplementary Note 3). Temporal grouping was used  
328 by the top performers (including SMolPhot, MIATool<sup>41</sup> and SMAP-2018), and is visibly apparent as a  
329 more punctate super-resolved image (Fig 4A).

#### 330 *Choice of PSF model*

331 Most software used a variant of Gaussian PSF model. A few participants designed more accurate PSF  
332 models (Table S1). Either diffraction theory was used (MIATool<sup>41</sup>, LEAP<sup>39</sup>) or spline fitting of an  
333 analytical function to the experimental PSF was adopted (CSpline, SMAP-2018). Although simple  
334 Gaussian model PSFs were sufficient to obtain best-in-class performance for the 2D and astigmatic  
335 modalities (ADCG<sup>37</sup>, PeakFit, SMolPhot), top results for the more optically complex biplane and double  
336 helix modalities were exclusively PSF-modelling algorithms (SMAP-2018, CSpline, MIATool, LEAP).

#### 337 *Multi-algorithm packages*

338 Several software packages take a Swiss army knife approach of integrating multiple optional  
339 localization algorithms into one program, to be flexible enough to suit various experimental  
340 conditions<sup>20,33</sup>. SMAP-2018 and ThunderSTORM achieved strong across-the-board performance  
341 supporting this rationale.

#### 342 *Software run time*

343 Software run time is an important parameter for ease of use, and to facilitate real time analysis. We  
344 did not see any correlation between software localization performance (Efficiency) and software run  
345 time (Fig S24A). We thus created an alternative ranking metric, *Efficiency-Runtime*, which gave 25 %  
346 weighting to run time (Supplementary Note 1.7, Fig S24B). Many good performers in the efficiency-  
347 only ranking were relatively fast and thus retained good ranking (SMAP-2018, SMolPhot, 3D-  
348 DAOSTORM). Interestingly, two software packages highly optimized for speed gained top ranking in  
349 this analysis: pSMLM-3D<sup>42</sup> and QC-STORM.

#### 350 *Diagnostic tools for software and algorithm performance*

351 During our analysis, we frequently noticed common types of deviation between software results and  
352 ground truth which were easily diagnosed by visual inspection of the super-resolved comparison  
353 overlay of ground truth and observed localizations (Fig S19-20). This included not only obvious issues  
354 of poor localization precision or spot averaging at high density, but also other problems such as a  
355 common error of structural warping which significantly reduced software performance. On the  
356 competition website, we provide detailed diagnostic software reports including multiple examples of  
357 software performance on individual frames which should help developers to identify algorithm and  
358 software limitations and maximize software performance (Fig S21-22).

#### 359 **Assessment of software performance on real 3D STORM data**

360 We investigated the performance of a representative subset of astigmatism software on real STORM  
361 datasets of well-characterized test structures, microtubules and nuclear pore complex, NPC (Fig 4B,  
362 S15). This qualitative assessment was consistent with findings for simulated data. No performance  
363 difference between single and multi-emitter fitters was observed, which is not surprising since spot  
364 density in these datasets was low. Relatively poor software performance was immediately obvious  
365 from visual inspection (QuickPALM). Temporal grouping noticeably improved resolution (3D  
366 DAOSTORM, CSpline, MIATool, SMAP-2018). Gaussian fitting software (3D DAOSTORM, MIATool,



367 ThunderSTORM) gave robust nanoscale resolution images. Interestingly, experimental PSF fitting  
368 software (CSpline, SMAP-2018) gave noticeably improved resolution of fine structural features such  
369 as the top and bottom of the NPC (Fig 4B) or the hollow core of antibody-labelled microtubules (Fig  
370 S15).

## 371 **DISCUSSION**

372 We performed the first broad evaluation of software for 3D single molecule localization microscopy,  
373 to assess the state of the field and to allow non-specialists to determine the optimal software for their  
374 experiments.

375 In order to provide a realistic assessment of 3D software performance we tested software on  
376 simulations incorporating experimentally acquired microscope point spread functions. Our  
377 experimental-PSF-derived simulation approach is readily adaptable to novel engineered 3D SMLM  
378 PSFs<sup>43</sup> or to the PSF of individual microscopes. For instance, it would be possible to combine our  
379 derived-PSF approach with the SMLM sample simulation tool SuReSim<sup>44</sup> in order to generate ultra-  
380 realistic synthetic data, which could then be personalized to each experimentalists sample and  
381 microscope, to easily determine the blocker factors to maximal resolution, for a given experiment.

382 The strongest conclusion we draw from the 3D localization microscopy challenge is that choice of  
383 localization software greatly affects the quality of final super-resolution data, even at “easy” high SNR,  
384 low spot density conditions. Biplane performance was particularly dependent on software choice, with  
385 only one software (SMAP-2018) achieving near-Cramér-Rao lower bound performance. Double helix  
386 SMLM showed less sensitivity to choice of software than biplane, with astigmatic SMLM intermediate  
387 between the two. The best software in each modality performed close to the Cramér-Rao lower  
388 bounds over a wide focal range and successfully detected most molecules, even at low signal to noise.  
389 Average software in all three modalities was significantly worse, with the obtained axial resolution  
390 being particularly sensitive to software choice.

391 The second major conclusion of the 3D challenge is that localization software that explicitly includes  
392 the experimental PSF in the fitting model gives a significant performance increase for 3D SMLM. For  
393 the more optically complex biplane and double helix modalities in particular, the best results were  
394 exclusively from software using PSF modelling approaches (SMAP-2018, CSpline, MIATool). This result  
395 also highlights the need for experimental PSF modelling not only in SMLM software, but also  
396 emphasizes the high degree of experimental realism required of SMLM simulations. The clear  
397 performance advantage of experimental PSF modelling software in the 3D software challenge would  
398 have been unobservable had it been run with a simple Gaussian PSF.

399 Of the different algorithm classes, well-tuned single-emitter and multi-emitter fitting algorithms (each  
400 capable of dealing well with occasional molecule overlap) gave good results for low density 3D SMLM.  
401 We also found that several software packages for astigmatic or biplane imaging gave adequate  
402 performance for the challenging case of high molecule densities, as long as the image SNR was high.  
403 Current software packages gave poor performance when molecule density was high and image SNR  
404 was low. These results suggest that, at least with current algorithms, high density 3D SMLM  
405 performance is mediocre at high SNR, and poor at low SNR. Surprisingly, multi-emitter fitting did not  
406 show significant improvement over well-tuned single emitter fitting for the 3D high-density datasets;  
407 this may indicate that significant potential for improvement remains in this category.

408 Many software packages did not apply temporal grouping<sup>40</sup>, resulting in reduced software  
409 performance. Since temporal grouping is a simple step for maximum precision, we urge all software  
410 developers to integrate this approach into their software as an optional final step in the localization  
411 process.

412 The second 2D localization microscopy challenge provided the opportunity to reassess the state of the  
413 field. The performance of best-in-class 2D software over a range of conditions, at both high and low

414 spot density, is excellent. The performance of the best-in-class software at high spot density (ADCG<sup>37</sup>)  
415 was only moderately decreased compared with the low spot density results, with nearly identical  
416 molecule detection performance, and a 30 % increase in localization error. Interestingly, the top three  
417 performers in the 2D high density condition were all compressed sensing algorithms (ADCG<sup>37</sup>,  
418 FALCON<sup>36</sup>, SMfit). In low density 2D conditions, the best single-emitter, multi-emitter and compressed  
419 sensing algorithms all gave comparable, excellent, performance. We speculate that performance in  
420 this category may now be near optimal levels.

421 In future we plan to extend the SMLM challenge website and software into an open platform where  
422 the assessment process is fully automated, and where new competition simulations and assessment  
423 metrics can easily be created and contributed by the community. Scientific CMOS cameras are rapidly  
424 becoming a major platform for single molecule localization microscopy<sup>6</sup> and it will be important to  
425 include sCMOS simulations in future SMLM software assessments. Furthermore, there remain two  
426 important classes of super-resolution microscopy for which software performance is crucial, but no  
427 broad software assessment has yet been performed: fluorescence-fluctuation-based super-resolution  
428 microscopies (*e.g.*, 3B<sup>45</sup>, SOFI<sup>46</sup>, SRRF<sup>47</sup>) and structured illumination microscopy<sup>48</sup>.

429 The results of this competition clearly demonstrate the formidable algorithmic performance of the  
430 best 2D and 3D localization microscopy software. However, a key outstanding challenge that often  
431 hinders adoption of new algorithms is that only a small subset of algorithms are packaged in, or  
432 compatible with fast, well-maintained, user-friendly software packages, which include all stages of the  
433 SMLM data analysis pipeline – analysis, visualization and quantification. One solution would be for the  
434 SMLM software community to collectively adopt both a standard data format and a single software  
435 platform for future software development, such as FIJI/ ImageJ<sup>49</sup>. Any new algorithm released in this  
436 environment could be immediately and widely adopted by users, and easily integrated into existing  
437 packages for SMLM analysis, visualization and quantification.

438 Both the 3D and 2D localization challenges remain open and continuously updated on the competition  
439 website. This continuously evolving analysis of state of the art super-resolution software performance  
440 provides a valuable resource to super-resolution microscopists, helping to ensure they use software  
441 that gets the best out of hard-won data. It also provides SMLM software developers with a robust  
442 means of benchmarking new algorithms against current state of the art.

## 443 ACKNOWLEDGEMENTS

444 *Authors acknowledge the following funding sources: a Newcastle University Research Fellowship and*  
445 *a Wellcome Trust & Royal Society Sir Henry Dale Fellowship grant number 206670/Z/17/Z to SH; an*  
446 *European Research Council (ERC) under the European Union's Horizon 2020 research and innovation*  
447 *programme, Grant Agreement no. 692726 to DS, TAP, MU; UK BBSRC grants BB/M022374/1,*  
448 *BB/P027431/1, BB/R000697/1 grant and MRC grants MC-UU-12018/2, MR/K015826/1 to RH;*  
449 *European Research Council (ERC) grant CoG-724489, CellStructure to JR; National Institutes of Health*  
450 *grant 1R15GM128166-01 to GMH; and NSF SBIR grants 1353638, 1534745 to Double Helix LLC. We*  
451 *thank R. Piestun at University of Colorado for providing DH-PSF phase mask designs to Double Helix*  
452 *LLC. We thank all the localization microscopy challenge participants for their contribution: Hazen*  
453 *Babcock (3D-DAOSTORM, Cspline, L1H), Fabian Hauser (3D-STORM Tools), Shigeo Watanabe (3D-*  
454 *WTM, WTM), Nicholas Boyd (ADCG), Junhong Min, Kyong Jin and Jong Chul Ye (ALOHA, FALCON), Hervé*  
455 *Rouault (B-recs), Emmanuel Soubies (CELO-STORM), Artur Speiser, Srinivas Turagas and Jakob Macke*  
456 *(DECODE), Alex von Diezmann, Camille Bayas and W. E. Moerner (Easy-DHPSF), Thomas Vomhof and*  
457 *Jochen Reichel (FIRESTORM), Hanjie Pan (LEAP), Ann Wheeler (Localizer), Zhen-li Huang and Yujie*  
458 *Wang (MaLiang), J. Chao, R. Velmurugan, A. V. Abraham and R. J. Ober (MIATool), Hendrik Deschout*  
459 *(mlePALM), Thomas Pengo (Octane, PeakSelector), Yi-na Wang (PALMER), Alex Herbert*  
460 *(PeakFit), Koen Martens and Johannes Hohlbein (pSMLM-3D), Luchang Li (QC-STORM), Ricardo*  
461 *Henriques (QuickPALM), G. Tamas and J. Sinko (RainSTORM), Steve Wolter and Markus Sauer*  
462 *(RapidSTORM), Manfred Kirchgessner and Frederik Gruell (SFP Estimator), Yiming Li and Jonas Ries*  
463 *(SMAP), Hayato Ikoma (SMfit), A. Loot, A. Valdmann, M. Eltermann, M. Kree and M. Pärs*  
464 *(SMolPhot), Yoon J. Jung, Anthony Barsic Rafael Pietsun, and Nikta Fakhri (SOLAR\_STORM), Anna*  
465 *Archetti (STORMChaser), Martin Ovesny, Guy Hagen and Pavel Krizek (ThunderSTORM), Jiaqing Huang*  
466 *(TVSTORM), Adel Kechkar and Jean-Baptiste Sibarita (WaveTracer) and Benoît Lelandais (ZOLA-3D).*  
467 *We thank the SMLMS 2016 organizers (S. Manley and A. Radenovic, EPFL) for hosting a localization*  
468 *microscopy challenge special session. We also thank Double Helix LLC and Molecular Devices LLC for*  
469 *sponsoring the SMLMS 2016 special session. The sponsors had no input or influence on the research.*

## 470 AUTHOR CONTRIBUTIONS

471 DS and SH conceived and coordinated the study. DS, SH, TAP, AAr, HB, SC, AW, GMH, RH, TL, TP, JBS  
472 designed the study. SH, AAg, RH, JBS collected experimental PSFs. DS, TAP, SH, TL wrote simulation  
473 code. BR shared unpublished software. DS generated simulated datasets. JR shared experimental  
474 STORM data. AH, JR, JC, RV provided feedback and quality control on simulations and analysis  
475 methods. TAP carried out the assessment of software performance. TAP, DS, SH analysed  
476 and interpreted the results. DS, HB, RO, BR, GMH, JBS, JR, RH, MU, SH directed research. SH, DS, TAP  
477 wrote the manuscript with feedback from all authors.

## 478 REFERENCES

- 479 1. Betzig, E. *et al.* Imaging Intracellular Fluorescent Proteins at Nanometer Resolution. *Science* **313**,  
480 1642–1645 (2006).
- 481 2. Hess, S. T., Girirajan, T. P. K. & Mason, M. D. Ultra-High Resolution Imaging by Fluorescence  
482 Photoactivation Localization Microscopy. *Biophys. J.* **91**, 4258–4272 (2006).
- 483 3. Rust, M. J., Bates, M. & Zhuang, X. Sub-diffraction-limit imaging by stochastic optical reconstruction  
484 microscopy (STORM). *Nat Methods* **3**, 793–795 (2006).

- 485 4. Holden, S. J., Uphoff, S. & Kapanidis, A. N. DAOSTORM: an algorithm for high- density super-  
486 resolution microscopy. *Nat Meth* **8**, 279–280 (2011).
- 487 5. Huang, F., Schwartz, S. L., Byars, J. M. & Lidke, K. A. Simultaneous multiple-emitter fitting for single  
488 molecule super-resolution imaging. *Biomed. Opt. Express* **2**, 1377–1393 (2011).
- 489 6. Huang, F. *et al.* Video-rate nanoscopy using sCMOS camera-specific single-molecule localization  
490 algorithms. *Nat. Methods* **10**, 653–658 (2013).
- 491 7. Sage, D. *et al.* Quantitative evaluation of software packages for single-molecule localization  
492 microscopy. *Nat. Methods* **12**, 717–724 (2015).
- 493 8. Huang, B., Jones, S. A., Brandenburg, B. & Zhuang, X. Whole-cell 3D STORM reveals interactions  
494 between cellular structures with nanometer-scale resolution. *Nat Meth* **5**, 1047–1052 (2008).
- 495 9. Shtengel, G. *et al.* Interferometric fluorescent super-resolution microscopy resolves 3D cellular  
496 ultrastructure. *Proc. Natl. Acad. Sci.* **106**, 3125–3130 (2009).
- 497 10. Huang, B., Wang, W., Bates, M. & Zhuang, X. Three-Dimensional Super-Resolution Imaging by  
498 Stochastic Optical Reconstruction Microscopy. *Science* **319**, 810–813 (2008).
- 499 11. Pavani, S. R. P. *et al.* Three-dimensional, single-molecule fluorescence imaging beyond the  
500 diffraction limit by using a double-helix point spread function. *Proc. Natl. Acad. Sci.* **106**, 2995–2999  
501 (2009).
- 502 12. Juetten, M. F. *et al.* Three-dimensional sub-100 nm resolution fluorescence microscopy of thick  
503 samples. *Nat. Methods* **5**, 527–529 (2008).
- 504 13. Shtengel, G. *et al.* Interferometric fluorescent super-resolution microscopy resolves 3D  
505 cellular ultrastructure. *Proc. Natl. Acad. Sci.* **106**, 3125–3130 (2009).
- 506 14. Babcock, H., Sigal, Y. M. & Zhuang, X. A high-density 3D localization algorithm for stochastic  
507 optical reconstruction microscopy. *Opt. Nanoscopy* **1**, 1–10 (2012).
- 508 15. Ovesný, M., Křížek, P., Švindrych, Z. & Hagen, G. M. High density 3D localization microscopy  
509 using sparse support recovery. *Opt. Express* **22**, 31263–31276 (2014).

- 510 16. Min, J. *et al.* 3D high-density localization microscopy using hybrid astigmatic/ biplane imaging  
511 and sparse image reconstruction. *Biomed. Opt. Express* **5**, 3935–3948 (2014).
- 512 17. Zhang, S., Chen, D. & Niu, H. 3D localization of high particle density images using sparse  
513 recovery. *Appl. Opt.* **54**, 7859–7864 (2015).
- 514 18. Annibale, P., Vanni, S., Scarselli, M., Rothlisberger, U. & Radenovic, A. Quantitative Photo  
515 Activated Localization Microscopy: Unraveling the Effects of Photoblinking. *PLOS ONE* **6**, e22678  
516 (2011).
- 517 19. Collaboration through competition. *Nat. Methods* **11**, 695 (2014).
- 518 20. Li, Y. *et al.* Real-time 3D single-molecule localization using experimental point spread  
519 functions. *Nat. Methods* (2018). doi:10.1038/nmeth.4661
- 520 21. Izeddin, I. *et al.* PSF shaping using adaptive optics for three-dimensional single-molecule  
521 super-resolution imaging and tracking. *Opt. Express* **20**, 4957–4967 (2012).
- 522 22. Grover, G., DeLuca, K., Quirin, S., DeLuca, J. & Piestun, R. Super-resolution photon-efficient  
523 imaging by nanometric double-helix point spread function localization of emitters (SPINDLE). *Opt.*  
524 *Express* **20**, 26681–26695 (2012).
- 525 23. Carlini, L. & Manley, S. Live Intracellular Super-Resolution Imaging Using Site-Specific Stains.  
526 *ACS Chem. Biol.* **8**, 2643–2648 (2013).
- 527 24. Shim, S.-H. *et al.* Super-resolution fluorescence imaging of organelles in live cells with  
528 photoswitchable membrane probes. *Proc. Natl. Acad. Sci.* **109**, 13978–13983 (2012).
- 529 25. Baddeley, D. & Bewersdorf, J. Biological Insight from Super-Resolution Microscopy: What We  
530 Can Learn from Localization-Based Images. *Annu. Rev. Biochem.* **87**, 965–989 (2018).
- 531 26. Loot A. , Valdmann A., Eltermann M., Kree M., Pärs M. SMolPhot Software. Available at:  
532 <https://bitbucket.org/ardiloot/smolphot-software/wiki/Home>. (Accessed: 29th November 2018)
- 533 27. Babcock, H. P. & Zhuang, X. Analyzing Single Molecule Localization Microscopy Data Using  
534 Cubic Splines. *Sci. Rep.* **7**, 552 (2017).

- 535 28. Fox-Roberts, P. *et al.* Local dimensionality determines imaging speed in localization  
536 microscopy. *Nat. Commun.* **8**, 13558 (2017).
- 537 29. Henriques, R. *et al.* QuickPALM: 3D real-time photoactivation nanoscopy image processing in  
538 ImageJ. *Nat Meth* **7**, 339–340 (2010).
- 539 30. Takeshima, T., Takahashi, T., Yamashita, J., Okada, Y. & Watanabe, S. A multi-emitter fitting  
540 algorithm for potential live cell super-resolution imaging over a wide range of molecular densities.  
541 *J. Microsc.* **271**, 266–281 (2018).
- 542 31. Kechkar, A., Nair, D., Heilemann, M., Choquet, D. & Sibarita, J.-B. Real-Time Analysis and  
543 Visualization for Single-Molecule Based Super-Resolution Microscopy. *PLOS ONE* **8**, e62918 (2013).
- 544 32. Alex Herbert. PeakFit Software. Available at:  
545 [http://www.sussex.ac.uk/gdsc/intranet/microscopy/UserSupport/AnalysisProtocol/imagej/smlm](http://www.sussex.ac.uk/gdsc/intranet/microscopy/UserSupport/AnalysisProtocol/imagej/smlm_plugins/)  
546 [\\_plugins/](http://www.sussex.ac.uk/gdsc/intranet/microscopy/UserSupport/AnalysisProtocol/imagej/smlm_plugins/). (Accessed: 29th November 2018)
- 547 33. Ovesný, M., Křížek, P., Borkovec, J., Švindrych, Z. & Hagen, G. M. ThunderSTORM: a  
548 comprehensive ImageJ plug-in for PALM and STORM data analysis and super-resolution imaging.  
549 *Bioinformatics* **30**, 2389–2390 (2014).
- 550 34. Soubies, E., Blanc-Féraud, L. & Aubert, G. A Continuous Exact  $\ell_0$  Penalty (CELO) for Least  
551 Squares Regularized Problem. *SIAM J. Imaging Sci.* **8**, 1607–1639 (2015).
- 552 35. Babcock, H. P., Moffitt, J. R., Cao, Y. & Zhuang, X. Fast compressed sensing analysis for super-  
553 resolution imaging using L1-homotopy. *Opt. Express* **21**, 28583–28596 (2013).
- 554 36. Min, J. *et al.* FALCON: fast and unbiased reconstruction of high-density super-resolution  
555 microscopy data. *Sci. Rep.* **4**, 4577 (2014).
- 556 37. Boyd, N., Schiebinger, G. & Recht, B. The Alternating Descent Conditional Gradient Method  
557 for Sparse Inverse Problems. *SIAM J. Optim.* **27**, 616–639 (2017).
- 558 38. Huang, J., Sun, M. & Chi, Y. Super-resolution image reconstruction for high-density 3D single-  
559 molecule microscopy. in *2016 IEEE 13th International Symposium on Biomedical Imaging (ISBI)*  
560 241–244 (2016). doi:10.1109/ISBI.2016.7493254

- 561 39. Pan, H., Simeoni, M., Hurley, P., Blu, T. & Vetterli, M. LEAP: Looking beyond pixels with  
562 continuous-space Estimation of Point sources. *Astron. Astrophys.* **608**, A136 (2017).
- 563 40. Durisic, N., Laparra-Cuervo, L., Sandoval-Álvarez, Á., Borbely, J. S. & Lakadamyali, M. Single-  
564 molecule evaluation of fluorescent protein photoactivation efficiency using an in vivo  
565 nanotemplate. *Nat. Methods* **11**, 156–162 (2014).
- 566 41. Chao, J., Ward, E. S. & Ober, R. J. A software framework for the analysis of complex microscopy  
567 image data. *IEEE Trans. Inf. Technol. Biomed. Publ. IEEE Eng. Med. Biol. Soc.* **14**, 1075–1087 (2010).
- 568 42. Martens, K. J. A., Bader, A. N., Baas, S., Rieger, B. & Hohlbein, J. Phasor based single-molecule  
569 localization microscopy in 3D (pSMLM-3D): An algorithm for MHz localization rates using standard  
570 CPUs. *J. Chem. Phys.* **148**, 123311 (2017).
- 571 43. Shechtman, Y., Weiss, L. E., Backer, A. S., Sahl, S. J. & Moerner, W. E. Precise Three-  
572 Dimensional Scan-Free Multiple-Particle Tracking over Large Axial Ranges with Tetrapod Point  
573 Spread Functions. *Nano Lett.* **15**, 4194–4199 (2015).
- 574 44. Venkataramani, V., Herrmannsdörfer, F., Heilemann, M. & Kuner, T. SuReSim: simulating  
575 localization microscopy experiments from ground truth models. *Nat. Methods* **13**, 319–321 (2016).
- 576 45. Cox, S. *et al.* Bayesian localization microscopy reveals nanoscale podosome dynamics. *Nat.*  
577 *Methods* **9**, 195–200 (2012).
- 578 46. Dertinger, T., Colyer, R., Iyer, G., Weiss, S. & Enderlein, J. Fast, background-free, 3D super-  
579 resolution optical fluctuation imaging (SOFI). *Proc. Natl. Acad. Sci.* **106**, 22287–22292 (2009).
- 580 47. Gustafsson, N. *et al.* Fast live-cell conventional fluorophore nanoscopy with ImageJ through  
581 super-resolution radial fluctuations. *Nat. Commun.* **7**, (2016).
- 582 48. Gustafsson, M. G. L. Surpassing the lateral resolution limit by a factor of two using structured  
583 illumination microscopy. SHORT COMMUNICATION. *J. Microsc.* **198**, 82–87 (2000).
- 584 49. Schindelin, J. *et al.* Fiji: an open-source platform for biological-image analysis. *Nat. Methods*  
585 **9**, 676–682 (2012).

- 586 50. Hanser B. M., Gustafsson M. G. L., Agard D. A. & Sedat J. W. Phase-retrieved pupil functions in  
587 wide-field fluorescence microscopy. *J. Microsc.* **216**, 32–48 (2004).
- 588 51. Hirsch, M., Wareham, R. J., Martin-Fernandez, M. L., Hobson, M. P. & Rolfe, D. J. A Stochastic  
589 Model for Electron Multiplication Charge-Coupled Devices – From Theory to Practice. *PLOS ONE* **8**,  
590 e53671 (2013).
- 591 52. Basden, A. G., Haniff, C. A. & Mackay, C. D. Photon counting strategies with low-light-level  
592 CCDs. *Mon. Not. R. Astron. Soc.* **345**, 985–991 (2003).
- 593 53. Carlini, L., Holden, S. J., Douglass, K. M. & Manley, S. Correction of a Depth-Dependent Lateral  
594 Distortion in 3D Super-Resolution Imaging. *PLoS ONE* **10**, e0142949 (2015).
- 595



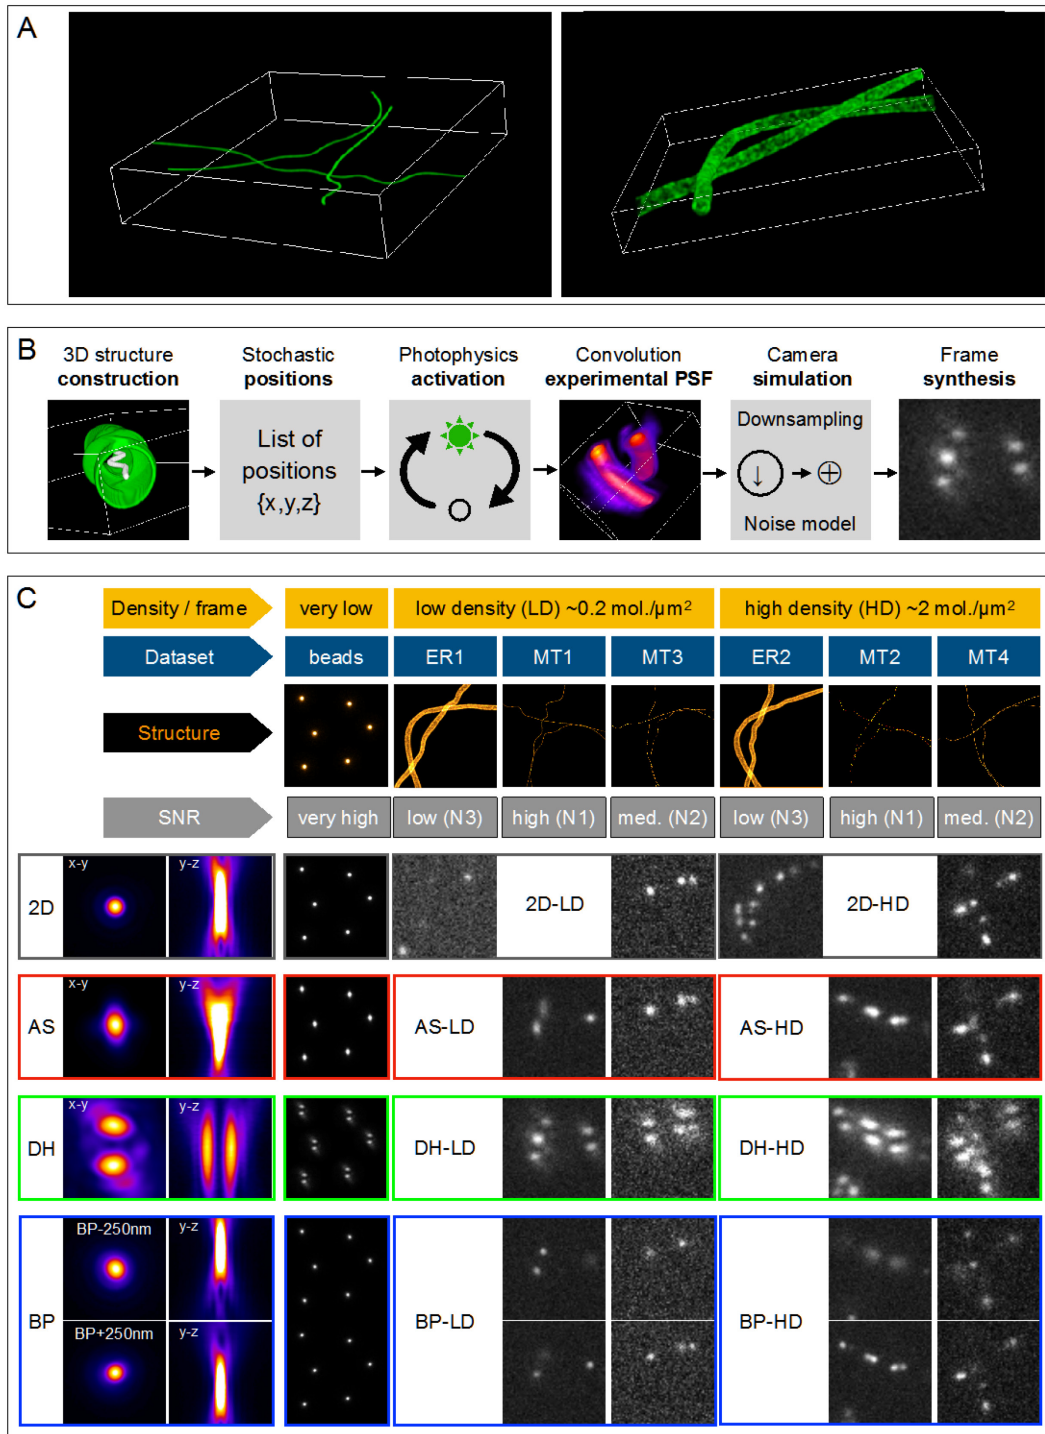

596

597

598

599

600

601

602

603

604

605

606

607

**Figure 1: Summary of SMLM challenge simulations.** **A.** 3D rendering of microtubules and endoplasmic reticulum samples in a  $6.4 \mu\text{m} \times 6.4 \mu\text{m} \times 1.5 \mu\text{m}$  volume. **B.** Key simulation steps. The structure is constructed from 3D tubes continuously defined by three B-spline functions in the volume of interest. Membranes of the tubes are densely populated with possible positions. Fluorophores follow a 4-state photophysics model. Activations of a given frame are convolved with the experimental PSF and shot & camera noise is added. **C.** Summary of all 16 challenge datasets, calibration data and experimental PSFs. Each dataset is characterized by its structure (endoplasmic reticulum (ER) or microtubules (MT)), by its modality (2D, AS, DH, BP), its density (LD or HD) and by its SNR determined by the level of noise N1, N2, and N3. Left column: orthogonal projections of the experimentally-derived PSF. Eight categories were proposed for the challenge containing two datasets each, 2D-LD and 2D-HD, grey; AS-LD and AS-HD, red; DH-LD and DH-HD, green; BP-LD and BP-HD, blue.

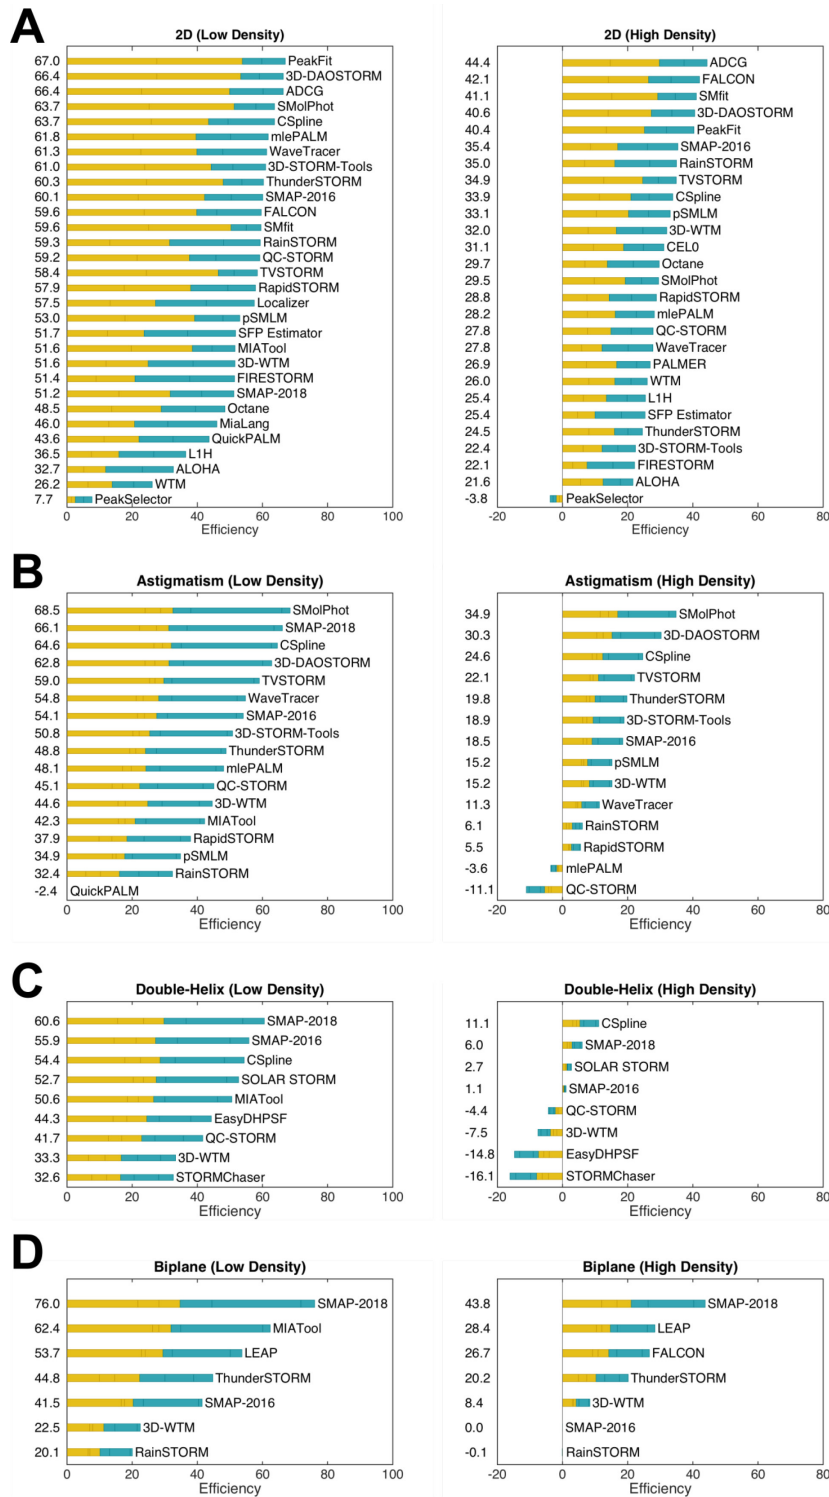

608

609 **Figure 2: Leaderboards for each competition modality, at low and high spot density.** Ranking is based  
 610 on the efficiency of software based on fraction of successfully detected molecules (Jaccard index) and  
 611 precision of localization (RMSE, root mean square error, lateral & axial). The contribution of the high  
 612 SNR dataset is plotted in orange and the contribution of the low SNR dataset to the efficiency is plotted  
 613 in blue.

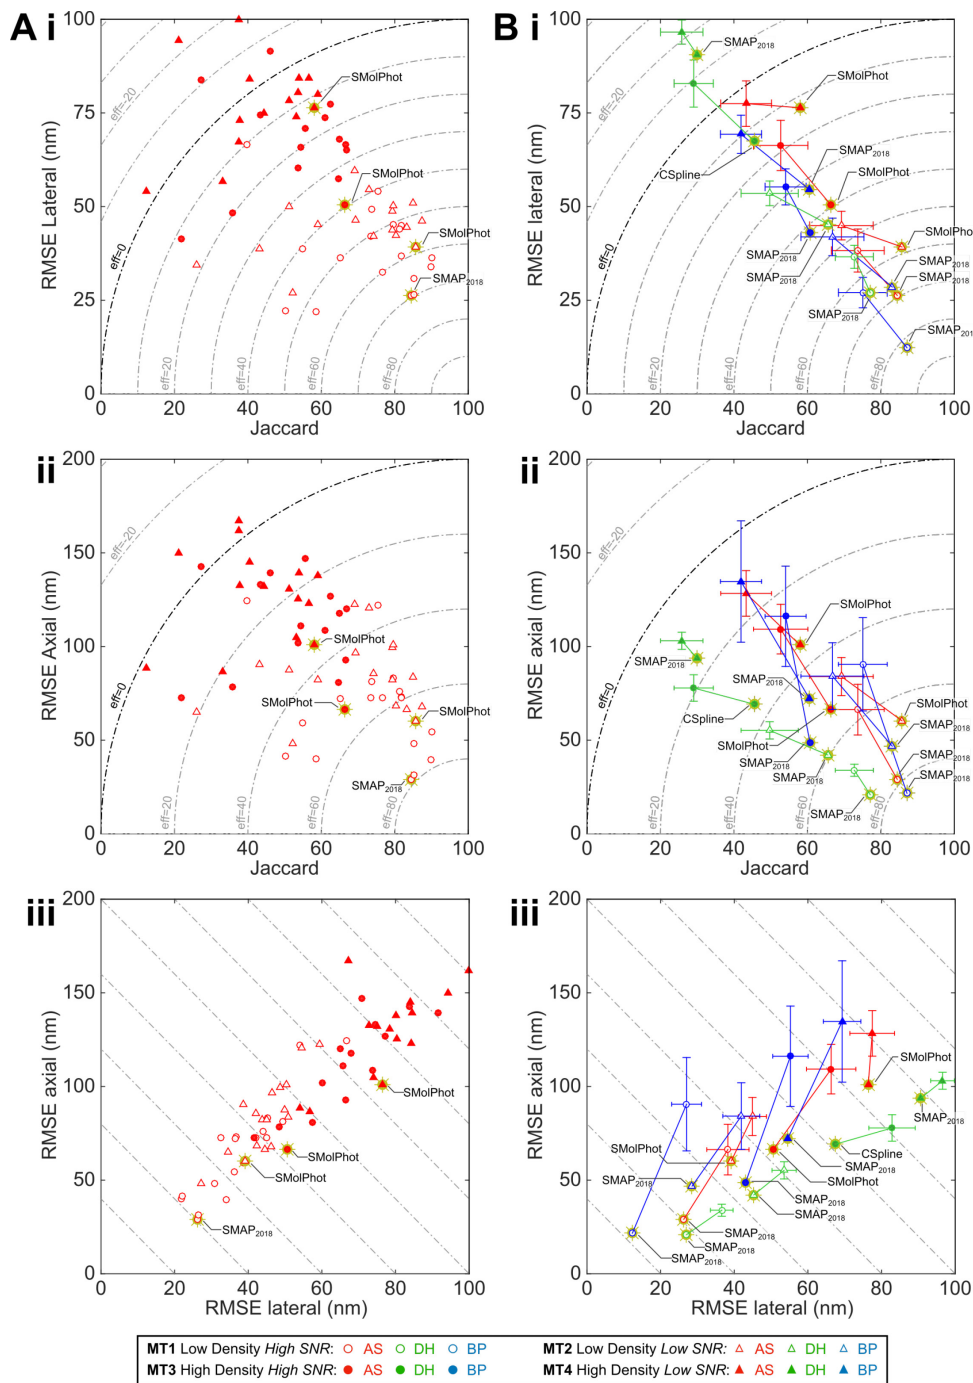

614

615 **Figure 3: Comparison of 3D software performance.** Gold stars indicate top performers for each  
 616 dataset. Dashed lines in top, middle panels indicate overall efficiency (higher is better). **A.** Localization  
 617 error and spot detection performance of all astigmatic SMLM software. **B.** Average (colored marker  
 618 with *s.d.* error bars) and best-in-class (colored marker with gold star) software performance for all  
 619 competition modalities. *AS*, astigmatism; *DH*, double helix; *BP*, biplane.

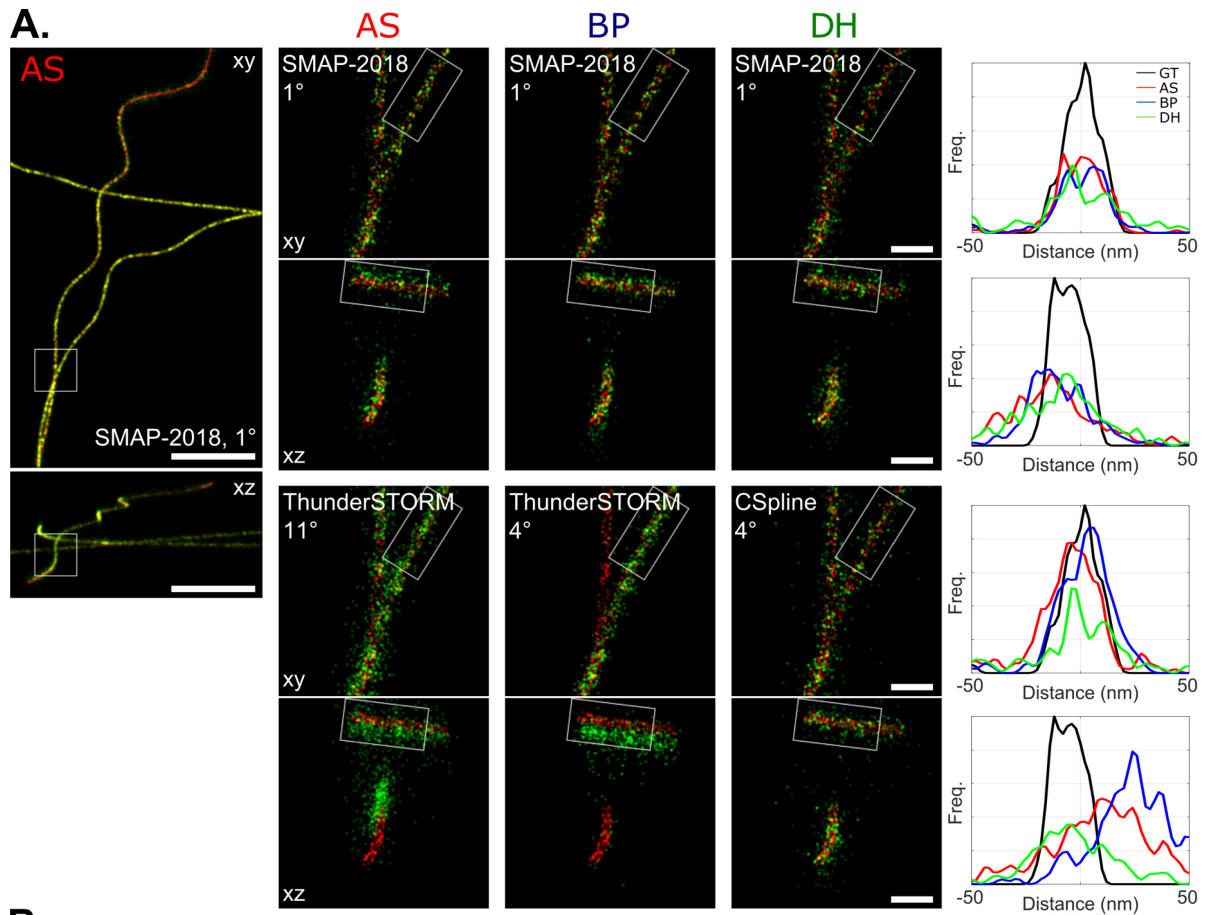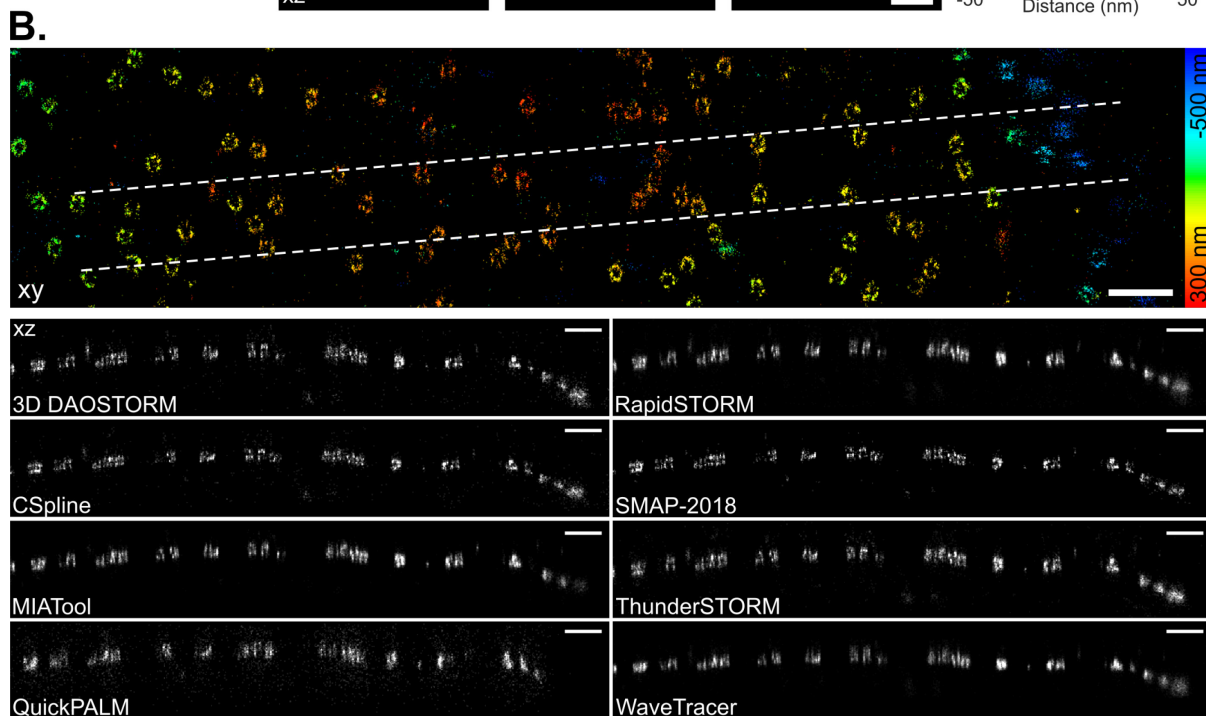

620

621 **Figure 4: A.** Super-resolved *xy* and *xz* projection images of 3D competition datasets for best-in-class  
 622 (top) and representative average (bottom) software in each modality, for high SNR low density dataset.  
 623 Left: *xy* and *xz* overview images for winning AS software. Middle: *xy* and *xz* zoom images of boxed  
 624 regions in left panel, for winning and mid-range software, each modality. Right: *Xy* and *xz* line profiles  
 625 of winning and mid-range software for each modality, for boxed regions in middle panel. Image colors:  
 626 red, ground truth; green, software results. Line profiles: GT, ground truth, black; AS, astigmatism, red;

627 BP, biplane, blue; DH, double helix, green. *Panel key:* Software-name Dataset-Ranking°. *Scale bar:* full  
628 image, 1  $\mu\text{m}$ , magnified regions, 100 nm. **B. Performance of astigmatism software on real 3D STORM**  
629 *images of the nuclear pore complex. Top:* Super-resolved overview image in *Xy* for 3D-DAOSTORM  
630 software, color coded for depth. *Bottom:* *Xz* orthoslices along 600 nm wide dashed region indicated  
631 in top panel for 8 astigmatism software packages. The best performing software clearly resolves the  
632 top and bottom of the NPCs. *Scale bars,* 500 nm.

633

## 634 **METHODS**

### 635 **1. CHALLENGE ORGANIZATION**

636 We first ran the 3D SMLM software challenge as a time limited competition, with a results session  
637 hosted as a special session of the 6<sup>th</sup> Annual Single Molecule Localization Microscopy Symposium in  
638 August 2016. The competition has now been converted to a permanent software challenge accepting  
639 new submissions. Special mention to the software SMAP and 3D-WTM that participate to our eight  
640 categories (*density x modality*). The current list of participants is at:

641 <http://bigwww.epfl.ch/smlm/challenge2016/index.html?p=participants>

642 All datasets, methods, participations, and results of the challenge 2016 made available at  
643 <http://bigwww.epfl.ch/smlm/challenge2016/>. Software for simulation and analysis is hosted on the  
644 competition GitHub repository: <https://github.com/SMLM-Challenge/Challenge2016/>

### 645 **2. LOCALIZATION MICROSCOPY SIMULATIONS**

#### 646 **2.1. Structure**

647 The synthetic datasets were designed to be similar to images derived from cellular structures in real  
648 experimental conditions. We defined mathematical models for cellular structures that imitate  
649 cytoskeletal filaments such as microtubules and larger tubular structures such as the endoplasmic  
650 reticulum or mitochondria (Fig S1A). These structures have a tubular shape in the 3D space. Pseudo-  
651 microtubules are defined with their central axis elongating in a 3D space having an average outer  
652 diameter of 25 nm with an inner, hollow tube of 15 nm diameter. Pseudo-endoplasmic reticulum is  
653 defined as having a diameter of approximately 150nm.

654 The underlying sample structure is formalized in a continuous space which allows rendering of digital  
655 images at any scale, from very high resolution (up to 1 nm/pixel) to low resolution (camera resolution:  
656 100 nm/ pixel). The continuous-domain 3D curve is represented by means of a polynomial spline. The  
657 sample is imaged in a  $6.4 \times 6.4 \mu\text{m}^2$  field of view, and the center lines of the microtubules have limited  
658 variation along the *z* (vertical) axis, *i.e.*, less than 1.5  $\mu\text{m}$ . The fluorescent markers are uniform  
659 randomly distributed over the structure according to the required density. The photon emission rate  
660 of each fluorophore is controlled by a photo-activation model (see below).

661 The exact locations of all fluorophores are stored at high precision floating-point numbers expressed  
662 in nanometers. This ground-truth file is useful for conducting objective evaluations without human  
663 bias.

#### 664 **2.2. Photophysics activation model**

665 Given a list of source locations from the structure simulator, fluorophore blinking was simulated by a  
666 4-states Markov chain model. The states are ON, OFF, BLEACH, DARK and the transition are Poisson  
667 distributed (Fig S1C), except for the OFF to ON transitions which follow a uniform random distribution,  
668 to reflect that in typical experimental conditions, constant imaging density is maintained by tuning the  
669 photoactivation rate during the experiment. All switching is calculated at sub-frame resolution and  
670 then total fluorophore on-time was integrated over each frame.

671 Due to two decay paths, the actual mean lifetime of the state ON is

$$672 \bar{T}_{\text{LIFETIME}} = \frac{1}{\frac{1}{T_{\text{ON}}} + \frac{1}{T_{\text{BLEACH}}}}$$

673 Switching rates were chosen to approximate photoactivatable fluorescent proteins  $T_{\text{ON}} = 3$  frame,  $T_{\text{DARK}}$   
674  $= 2.5$  frames, and  $T_{\text{BLEACH}} = 1.5$  frames.

675 Fractional fluorophore ON-times per frame (between 0 and 1) were then multiplied by the mean flux  
676 of photon emission. The flux of photons expressed in photons/seconds was given by the relation

$$677 \quad \mathbf{F} = \frac{\phi \cdot P \cdot \sigma}{e}$$

678  $\Phi$  is the quantum yield of the dye,  $P$  is power of the laser in  $\text{W}/\text{cm}^2$ ,  $e = h c / \lambda$  is the energy of one  
679 photon,  $\sigma = 1000 \ln(10) \epsilon / N_A$  is the absorption cross section in  $\text{cm}^2$  and  $\epsilon$  is the molar extinction  
680 coefficient (EC) or absorptivity in  $\text{cm}^2/\text{mol}$  which is a characteristic of a given fluorophore. The laser  
681 power was Gaussian distributed over the field of view. At the end of this process a list of XY positions,  
682 on-frames and (noise-free) intensities for all activated fluorophores was obtained.

683 Analysis of the resulting simulated photon counting distribution is presented in Supplementary  
684 Note 1.

### 685 **2.3. Experimental Point-Spread Function**

686 Model PSFs, stored as high resolution look up tables, were derived from experimentally measured  
687 PSFs. Although the algorithmic approach is distinct, this concept of accurately modelling the  
688 experimental PSF based on calibration data bears relation to the PSF phase retrieval approach  
689 previously employed by Hanser and coworkers<sup>50</sup>.

690 Images of fluorescent beads were recorded for each modality (Table S4). Signal to noise ratio of  
691 recorded PSFs was maximized in all cases by maximizing exposure time and averaging over several  
692 frames to increase dynamic range.

693 To acquire experimental PSFs, we took 100 nm Tetraspek beads (Invitrogen) adsorbed to #1.5 (170  $\mu\text{m}$   
694 thick) coverglass, imaged in water. The excitation wavelength was between 640 nm and 647 nm, and  
695 a Cy5 emission filter was used. Data acquisition parameters for each modality are listed in Table S4.

### 696 **2.4. Simulation PSF construction**

697 For each modality, 3-6 beads were selected within a small ( $< 32 \mu\text{m}$ ) region, to minimize PSF variation  
698 due to spherical aberration. Images for each selected bead were interpolated in XY to a pixel size of  
699 10 nm. Beads were then coaligned by cross-correlation on the in-focus frame. Coaligned beads were  
700 averaged in XY to minimize pixel quantization artefacts and to increase SNR. Where necessary, Z-stacks  
701 were interpolated to a Z-step size of 10 nm. A central Z-range of 1.5  $\mu\text{m}$  was selected that represents  
702 151 optical planes with a Z-step of 10 nm. The Z-range covers -750 nm to +750 nm. The plane of best  
703 focus was chosen as the simulation 0 nm plane. Each model PSF was normalized such that the total  
704 intensity of the PSF in the in-focus frame within a diameter of 3 FWHM from the PSF center was equal  
705 to 1.

706 For the DH PSF, the transmission of the combined phase mask system was measured as 96 %, which  
707 was approximated as 100 % brightness relative to the 2D and astigmatic PSFs.

708 In biplane super-resolution microscopy, emitted fluorescence is split into two simultaneously imaged  
709 channels, with a small (500-1000 nm) defocus introduced between the two channels<sup>12</sup>. As the small  
710 defocus should introduce minimal additional aberration into an optical system, we semi-synthetically  
711 constructed a realistic biplane PSF from the experimental 2D PSF. The two defocused PSFs were  
712 constructed by duplicating the 2D PSF and offsetting it by -250 nm and 250 nm for each Z-plane.

713 This yielded five high SNR model PSFs with an isotropic voxel size of  $10 \times 10 \times 10 \text{ nm}^3$ .

714 The ground truth XY=0 was defined as the image centre of mass of the in-focus frame of the model  
715 PSF, and Z=0 was defined as the in-focus frame. Accounts for shifts in the fitted XY centre of the model  
716 PSF by localization software due to systematic offsets and Z-dependent variation of the model PSF  
717 centre of mass are dealt with below (wobble correction).

## 718 2.5. Noise model

719 A constant mean autofluorescent background was added to the noise-free simulated images, and  
720 these images were then fed through the noise model representing Poisson distributed fluorescence  
721 emission recorded on a high quantum efficiency back-illuminated EMCCD<sup>51,52</sup>.

722 The proposed noise model assumed as main contributions to the stochastic noise:

- 723 •  $\sigma_S$ , the shot noise produced by the fluorescence background and signal and the spurious  
724 charge. Shot noise can be derived from the second moment of the Poisson distribution
- 725 •  $\sigma_R$ , the read noise of EMCCD camera, which is described by second moment of the Gaussian  
726 distribution
- 727 •  $\sigma_{EM}$ , the electron multiplication noise introduced by the gain process, which is described by  
728 the second moment of the Gamma distribution<sup>52</sup>.

729

730 We assumed as camera parameters the ones specified for the Photometrics Evolve Delta 512 EMCCD  
731 camera:

- 732 • QE = 0.9, Evolve quantum efficiency at 700 nm absorption wavelength.
- 733 •  $\sigma_R = 74.4$  electrons, manufacturer measured root mean square noise for Evolve 512 camera
- 734 •  $c = 0.002$  electrons, manufacturer quoted spurious charge (clock induced charge only, dark  
735 counts negligible)
- 736 •  $EM_{gain} = 300$
- 737 •  $e_{adu} = 45$  electron per analog to digital unit (ADU), analog to digital conversion factor
- 738 •  $G = 0.9 \cdot 300 / 45 = 6$ , total system gain
- 739 • BL = 100 ADU

740 The final simulated photon electrons will thus be given by:

$$741 \quad n_{ie} = \mathcal{P}(QE \cdot n_{photIn} + c)$$

$$742 \quad n_{oe} = \Gamma(n_{ie}, EM_{gain}) + \mathcal{G}(0, \sigma_R)$$

743 which leads to the final pixel counts:

$$744 \quad ADU_{out} = \min\left(\frac{n_{oe} - n_{oe} \bmod e_{ADU}}{e_{per\ adu}} + BL, 65535\right)$$

## 745 2.6. Depth-dependent lateral distortion: Wobble

746 As the PSF models are experimentally derived, the 3D estimated localizations exhibit a depth-  
747 dependent lateral distortion, here called *wobble*. This optical distortion is due to a combination of a  
748 systematic offset (arbitrary definition of PSF center) and optical aberrations<sup>53</sup>. In order to compare  
749 estimated and true localizations, we correct this effect during the assessment (Section 3.1).

## 750 2.7 Comparison of software results between different modalities.

751 The intensities of the PSF in each imaging modality were normalized to facilitate comparison of results  
752 between different modalities. Software results between 2D, 3D AS and 3D DH modalities are expected  
753 to be directly comparable.

754 For the biplane model PSF, as the emitted fluorescence is split into two channels, the intensity in each  
755 of the two simulated biplane channels was additionally reduced by 50 %. We note that the  
756 fluorescence background was not reduced by 50 % as intended, leading to artificially high background  
757 for the biplane simulation. *I.e.*, the background in each of the two biplane channels is the same as in  
758 the single channel of the other modalities. However, due to the low background level in the 3D  
759 simulations, the effect on image SNR and thus localization error is small (see Fig S7), less than 5 nm



760 near the plane of focus. Therefore, as long as the small drop in image SNR is taken into account,  
761 approximate comparisons of the biplane data to the other modalities can still be made.

### 762 **3. SOFTWARE ASSESSMENT**

#### 763 **3.1 Protocol**

764 Each localization file submitted by the participants was manually checked for erroneous systematic  
765 errors in the definition of the dataset coordinate system, such as offsets, XY axis flips or clear scaling  
766 errors. Datasets were then programmatically standardized into a consistent output format. All  
767 modifications are publicly available. If required, the modifications consisted of columns reordering,  
768 reversing axes, XY axis swap, and shifting the lateral positions by a half camera pixel.

769 The assessment pipeline includes three main parts: localization processing, the pairing between true  
770 and estimated localization and the metrics calculations. The first one depends on the assessment  
771 settings. There are two switchable properties: photon thresholding and wobble correction. Their  
772 combinations yield four different assessment settings. Up to 64 assessment runs per software were  
773 possible (*i.e.*, 4 modalities, 4 datasets per modality). For any setting, we excluded the fluorophores  
774 within a lateral distance of 450 nm from the border. This value corresponds to the radius of the largest  
775 PSF, *i.e.*, Double Helix. The activations too close from the border are more difficult to localize and  
776 could bias the results.

777 The pairing between true and estimated localizations was performed frame by frame. The procedure  
778 matches two sets of localizations. We deployed the presorted nearest-neighbor search for its  
779 efficiency, with a linking threshold of 250 nm. The results are effectively similar to the computationally  
780 intensive Hungarian algorithm<sup>7</sup>.

#### 781 *Photon thresholding*

782 A photon threshold was required primarily due to the use of a realistic fluorophore blinking model.  
783 Since a fluorophore could activate/ bleach at any point in a simulated frame, this led to many frames  
784 containing very dim, undetectable localizations, eg. where a molecule had been active for one or more  
785 frames previously, and then bleached during the first 5 % of a frame. These fractional localizations  
786 should also be present but practically undetectable in an experimental dataset.

787 We decided to focus the software analysis on the localizations where the molecule was active for the  
788 majority of a frame, to be consistent with experimental expectations. Therefore, we implemented a  
789 photon threshold means where we kept the 75% brightest ground truth fluorophore activations.  
790 Because this was performed *after* the pairing step, observed localizations that were paired to  
791 discarded ground truth activations were also removed from the metric calculations.

#### 792 *Wobble correction*

793 The centroid of experimental point spread functions shifts laterally by as much as 50 nm, as a function  
794 of axial position<sup>10,53</sup>. This is most often ignored by localization software, and instead corrected post-  
795 hoc by reference to a calibration curve<sup>37</sup>. Since our simulated PSF is experimentally derived, it was  
796 necessary to correct for these artefactual shifts between the observed localizations and ground truth,  
797 as part of the assessment process. This correction was performed using calibration data uploaded by  
798 competitors, similar to the correction typically performed on experimental data<sup>53</sup>.

799 Three scenarios were proposed to the participants: no correction was applied during the assessment;  
800 the correction was based on a file provided by the participant itself or the correction was calculated  
801 by ourselves. The latter nevertheless requires the participant to localize a stack of beads we provided.  
802 Since the true positions of the beads are known, the difference between the estimated and true  
803 positions could be calculated and averaged. It thus yields the values for wobble correction.

804 In certain specific cases (identified on the competition website), at the request of authors, we did not  
805 apply this correction, for example because the software explicitly considered the whole 3D PSF during  
806 fitting and was thus immune to this lateral shift artefact. For accurate results, application of lateral  
807 shift correction is critical for analysis of localization microscopy simulations using experimentally  
808 derived PSFs, as can be seen by comparison of typical software results with and without wobble  
809 correction (Fig S11).

### 810 **3.2 Metrics**

811 We calculated a large number of analysis metrics to quantify the performance of software relative to  
812 ground truth. These are discussed in detail in Supplementary Note 1. The metrics are split into two  
813 categories: localization based and image based metrics.

814 The former directly relies on the localizations positions and notably includes the Recall, the Precision,  
815 the Jaccard Index, the RMSE (axial and lateral) and the consolidated Z-range. For the calculation of  
816 average software performance (Fig 3B) outlier software with an efficiency less than  $eff < -30$  were  
817 excluded from the measurement.

818 The image based metrics are computed from a rendered image and includes the Signal-to-Noise Ratio  
819 (SNR) and the Fourier Ring / Shell Correlation (FRC/FSC). To render the image, we added the  
820 contribution of each localized molecule at the corresponding pixels. A contribution takes the form of  
821 a 3D additive Gaussian with a Full-Width Half Maximum (FWHM) of 20 nm. A complete list of all  
822 computed metrics is shown in the Supplementary Note 2.

823 We also calculated localization based metric results as a function of axial position. We proceeded by  
824 considering a subset of activations lying within an interval of axial positions (*i.e.*, from the true  
825 localizations). Then, most of the metrics (*e.g.*, Recall) are locally computed. This yields a curve  
826 providing information on the depth performance of each software / modality.

827 In order to summarize software axial performance, we analyzed how the recall varied as a function of  
828 Z. A typical recall versus axial position curve (Fig S9) will drop at positions far from the focal plane,  
829 *i.e.*, where software can no longer detect spots to defocus. We first smoothed the curve using a sliding  
830 window. Then we computed the software Z-range, defined as the full width half maximal Recall of the  
831 smoothed curve (Fig S12). This quantity is visually intuitive and useful for discussion of the recall  
832 performance if considered alongside a plot of recall vs axial position. However, because FWHM recall  
833 depends on the maximal recall, ranking based on this procedure would promote a software which  
834 poorly performed everywhere (*i.e.*, flat curve), whereas a software which performed well in the focal  
835 plane but less well outside would obtain a worse FWHM recall. This observation leads us to produce  
836 a so-called consolidated Z-range, by multiplying the Z-range value by the maximal Recall, which should  
837 provide a robust metric that avoids the previous case scenario.

838 *Principal component analysis.* In order to analyse the relationship between analysis metrics we  
839 computed the covariance matrix between each metric and the principal component analysis (PCA) on  
840 the metrics (Fig S14B). Each metric was standardized before applying the covariance and the PCA. For  
841 convenience, we took the additive inverse of the metrics for which lower values are best (*i.e.*, FP, FN,  
842 RMSE, FRC, FSC).

843 Summary statistics and detailed results for each software are available on the competition website  
844 (<http://bigwww.epfl.ch/smlm/challenge2016/index.html?p=results>), which also includes a tool for  
845 side-by-side comparison of the results of multiple software packages

### 846 **3.3 Baseline Localization Software**

847 We developed a minimalist Java tool software that performs localizations of bright emitters on the 4  
848 modalities of the challenge 2016: 2D, Astigmatism, Double-Helix, and Biplane. This

849 SMLM\_BaselineLocalization software is only designed to establish the performance baseline for the  
850 SMLM challenge. It has intentionally limited lines of code and relies only on few threshold parameters  
851 to localize particles. It has basic calibration tool that has to run on a z-stack of beads to find the linear  
852  $f(x)$  relation between the axial position  $Z$  and the shape of the bead.

- 853 • Astigmatism:  $Z = f(W_x - W_y)$ , where  $W_x$  and  $W_y$  are respectively an estimation of the size in  $X$   
854 and  $Y$ .
- 855 • Double-Helix:  $Z = f(\theta)$ , where  $\theta$  is the angle formed the pairing of two close points.
- 856 • Biplane:  $Z = f(W_{\text{left}} - W_{\text{right}})$ , where  $W_{\text{left}}$  and  $W_{\text{right}}$  are respectively an estimation of the size of  
857 the spots in left and the right plane.

858 The Java code is available: <https://github.com/SMLM-Challenge/Challenge2016>

## 859 **4 REAL DATA ASSESSMENT**

860 Astigmatism software was tested on previously published real 3D STORM datasets of microtubules  
861 and nuclear pore complex<sup>20</sup>. The tubulin dataset corresponds to the raw data for Fig S6 in Ref 20, and  
862 the nuclear pore complex dataset corresponds to raw data for Fig S9 in Ref 20. Key acquisition  
863 parameters for data analysis are summarized on the competition website.

864 Data were analyzed by software authors or expert users, and submitted via the competition website.  
865 All data were drift corrected via cross-correlation. STORM images were rendered with a constant  
866 Gaussian blur with 3 nm standard deviation and saturated by 0.1 – 0.5 %. The complete scripts used  
867 for assessment and image rendering are available on the competition GitHub page.

## 868 **5 DATA AVAILABILITY**

### 869 **5.1 Data availability statement**

870 Simulated competition datasets are available at <http://bigwww.epfl.ch/smlm/challenge2016/>,  
871 together with the parameters used to generate the data. The ground truth list of simulated molecule  
872 positions for each competition dataset remains secret in order to allow the software challenge to  
873 remain continuously open to new submissions. However, ground truth data is available for the  
874 simulated training datasets.

### 875 **5.2 Code availability statement**

876 All software is available at <https://github.com/SMLM-Challenge/Challenge2016>
